# Supplementary material for: Tonoplast-localized nitrate uptake transporters involved in vacuolar nitrate efflux and reallocation in Arabidopsis
Source: PubMed Central journal article supplement (PMC5526873; doi:10.1038/s41598-017-06744-5), 2017-07-25
Supplement: 41598_2017_6744_MOESM1_ESM.pdf [file 41598_2017_6744_MOESM1_ESM.pdf]

**Tonoplast-localized nitrate uptake transporters involved  
in vacuolar nitrate efflux and reallocation in *Arabidopsis***

Ya-Ni He<sup>1,2,3</sup>, Jia-Shi Peng<sup>1</sup>, Yao Cai<sup>1,2</sup>, De-Fen Liu<sup>1,2</sup>, Yuan Guan<sup>1,3</sup>,  
Hong-Ying Yi<sup>1</sup>, Ji-Ming Gong<sup>1,\*</sup>

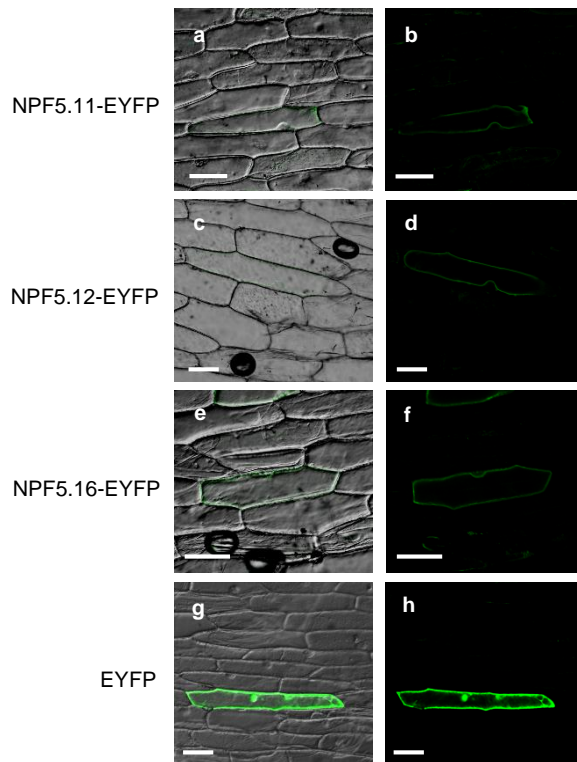

**Supplementary Figure S1. Subcellular localization of NPF5.11, NPF5.12 and NPF5.16.**

Onion epidermal cells transiently transformed with *NPF5.11-EYFP* (a,b), *NPF5.12-EYFP* (c,d), *NPF5.16-EYFP* (e,f) fusion or single *EYFP* (g,h) under the drive of cauliflower mosaic virus 35S promoter. Overlap images of EYFP fluorescence (green) and bright-field (a,c,e,g), EYFP fluorescence (b,d,f,h) images are shown. Bars = 100  $\mu$ m.

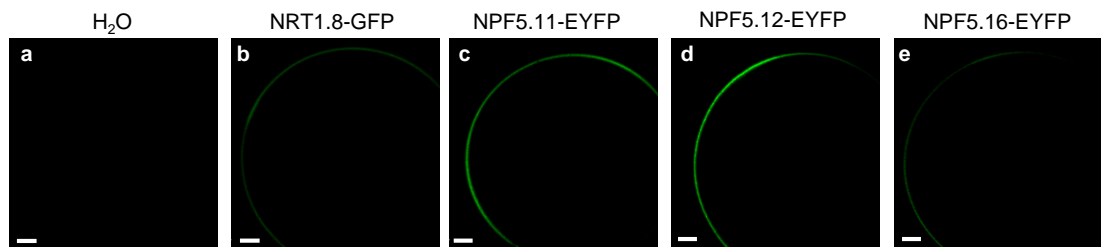

**Supplementary Figure S2. Expression of *NPF5.11*, *NPF5.12* and *NPF5.16* in oocytes.**

Oocytes were injected with H<sub>2</sub>O (a) or cRNA of *NRT1.8-GFP* (b), *NPF5.11-EYFP* (c), *NPF5.12-EYFP* (d), *NPF5.16-EYFP* (e) and imaged after incubation for 2 days. Bars = 100  $\mu$ m.

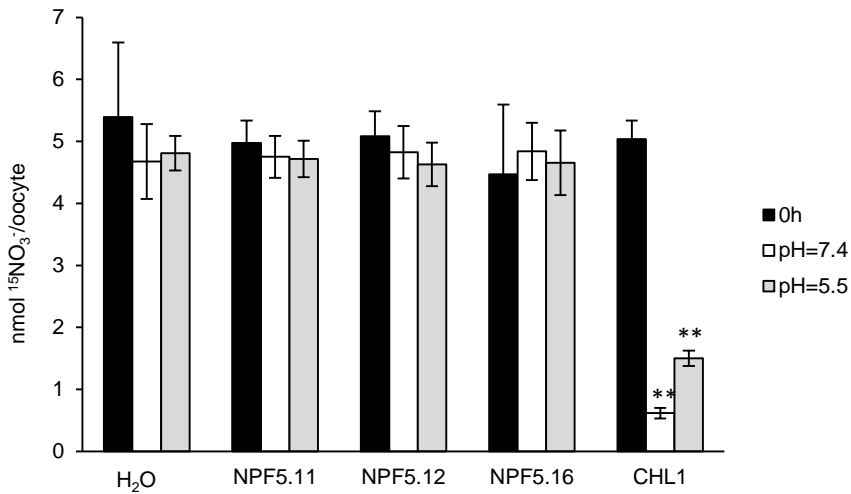

**Supplementary Figure S3. NPF5.11, NPF5.12 and NPF5.16 could not export nitrate in oocytes.**

50 nL of K<sup>15</sup>NO<sub>3</sub> (100 mM) was injected into oocytes previously injected with water, NPF5.11-, NPF5.12-, NPF5.16- or CHL1-cRNA. At 0 h (immediately after injection) or after 3 h of incubation in ND96 buffer at pH 5.5 or 7.4, oocytes were washed three times with ND96 buffer and <sup>15</sup>N was determined. Values are means ± SD (n = 6-10). Asterisks indicate difference at *P* < 0.01 (\*\*) compared with 0 h by Student's *t*-test.

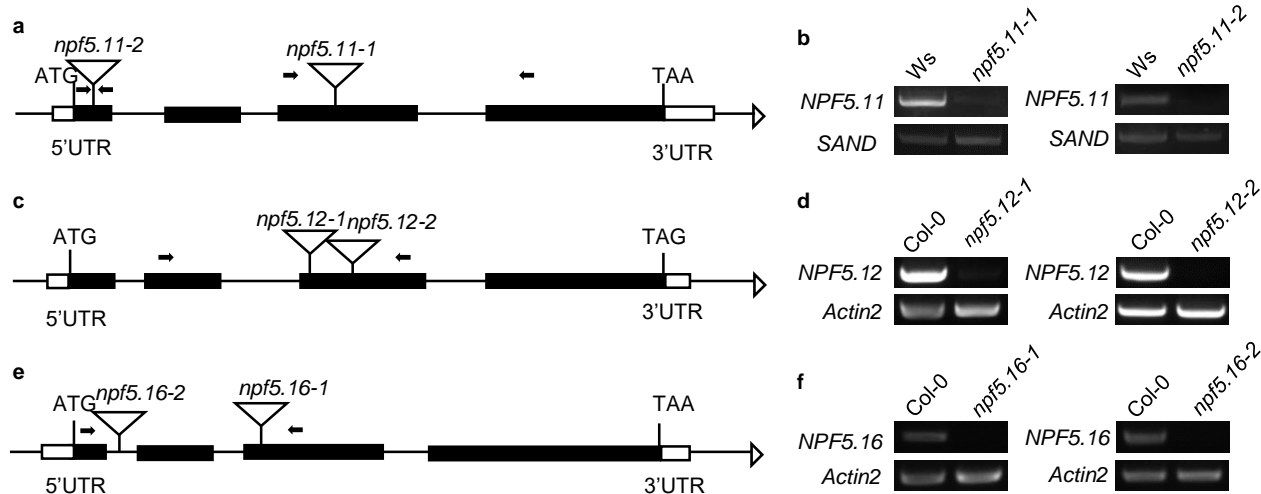

**Supplementary Figure S4. The identification of *npf5.11*, *npf5.12* and *npf5.16* knock-out mutants.**

(a,c,e) Schematic map of the T-DNA insertion sites in *npf5.11* (a), *npf5.12* (c) or *npf5.16* (e). Black boxes, coding regions; white boxes, untranslated regions (UTRs); Arrows, primers used for RT-PCR. (b,d,f) Expression of *NPF5.11* (b), *NPF5.12* (d) and *NPF5.16* (f) in the corresponding mutant lines, respectively. RNA isolated from roots (d) or leaves (b,f) of 28-d-old plants grown in hydroponics was used for RT-PCR analysis. *ACTIN* or *SAND* (loading control) was amplified for 28 cycles, *NPF5.11* (b) was amplified for 32 cycles, *NPF5.12* (d) and *NPF5.16* (f) were amplified for 35 cycles.

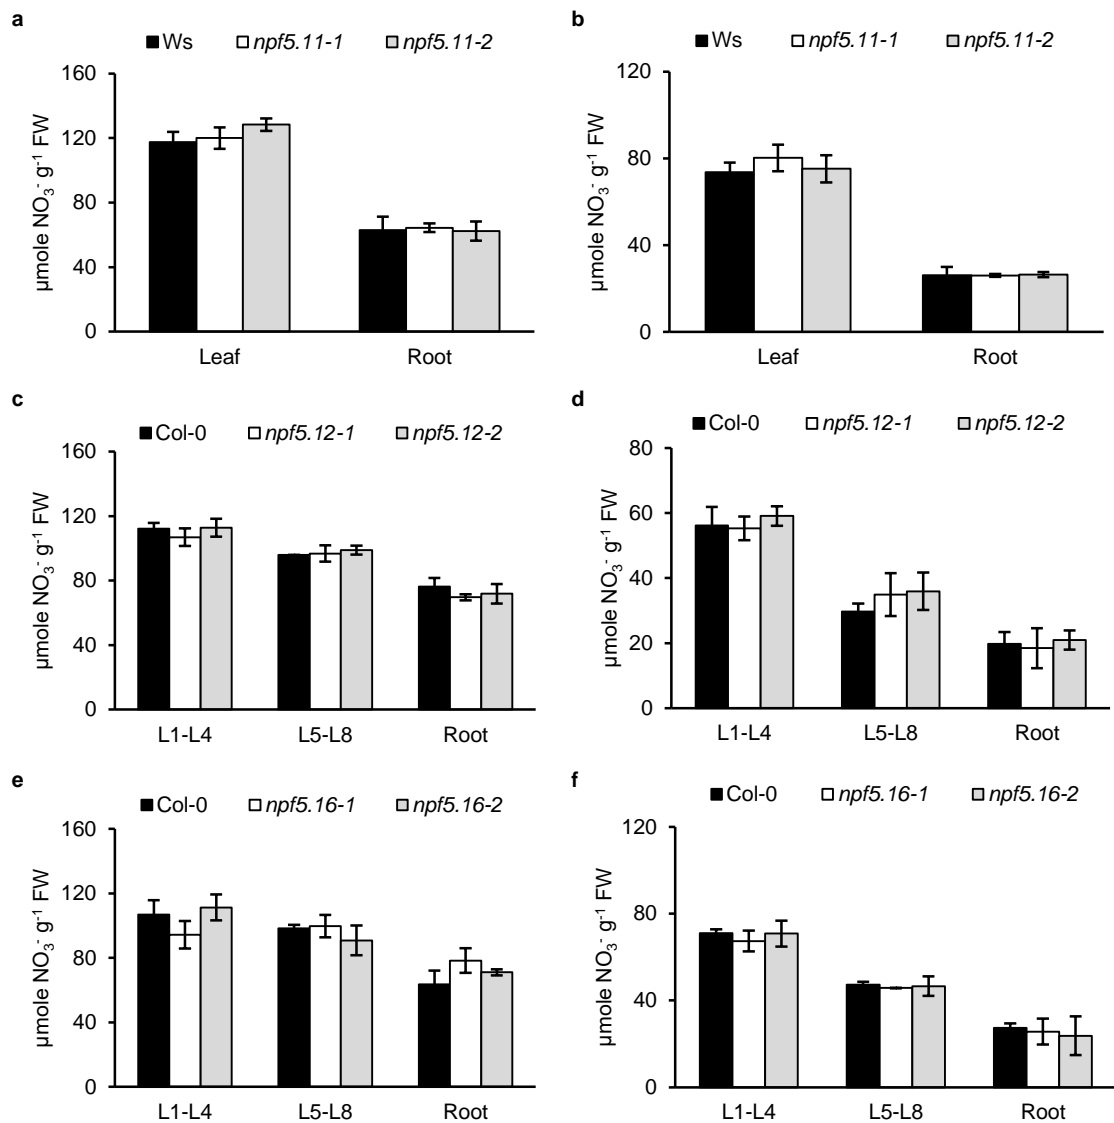

**Supplementary Figure S5. Mutation of *NPF5.11*, *NPF5.12* or *NPF5.16* do not affect nitrate accumulation under both control and nitrogen-starved conditions.**

(a,b) Plants were cultivated in hydroponics for 24 d (a) and then were treated with nitrogen-starved nutrient solution for 1 d (b), the leaves and roots of Ws and *npf5.11* were harvested to analyze nitrate concentration. Values are means  $\pm$  SD, n = 3. (c,d) Plants were cultivated in hydroponics for 28 d (c) and then were treated with nitrogen-starved nutrient solution for 1 d (d), old leaves (L1-L4), young leaves (L5-L8) and roots of Col-0 and *npf5.12* were harvested to analyze nitrate concentration. Values are means  $\pm$  SD, n = 3. (e,f) Plants were cultivated in hydroponics for 28 d (e) and then were treated with nitrogen-starved nutrient solution for 1 d (f), old leaves (L1-L4), young leaves (L5-L8) and roots of Col-0 and *npf5.16* were harvested to analyze nitrate concentration. Values are means  $\pm$  SD, n = 3.

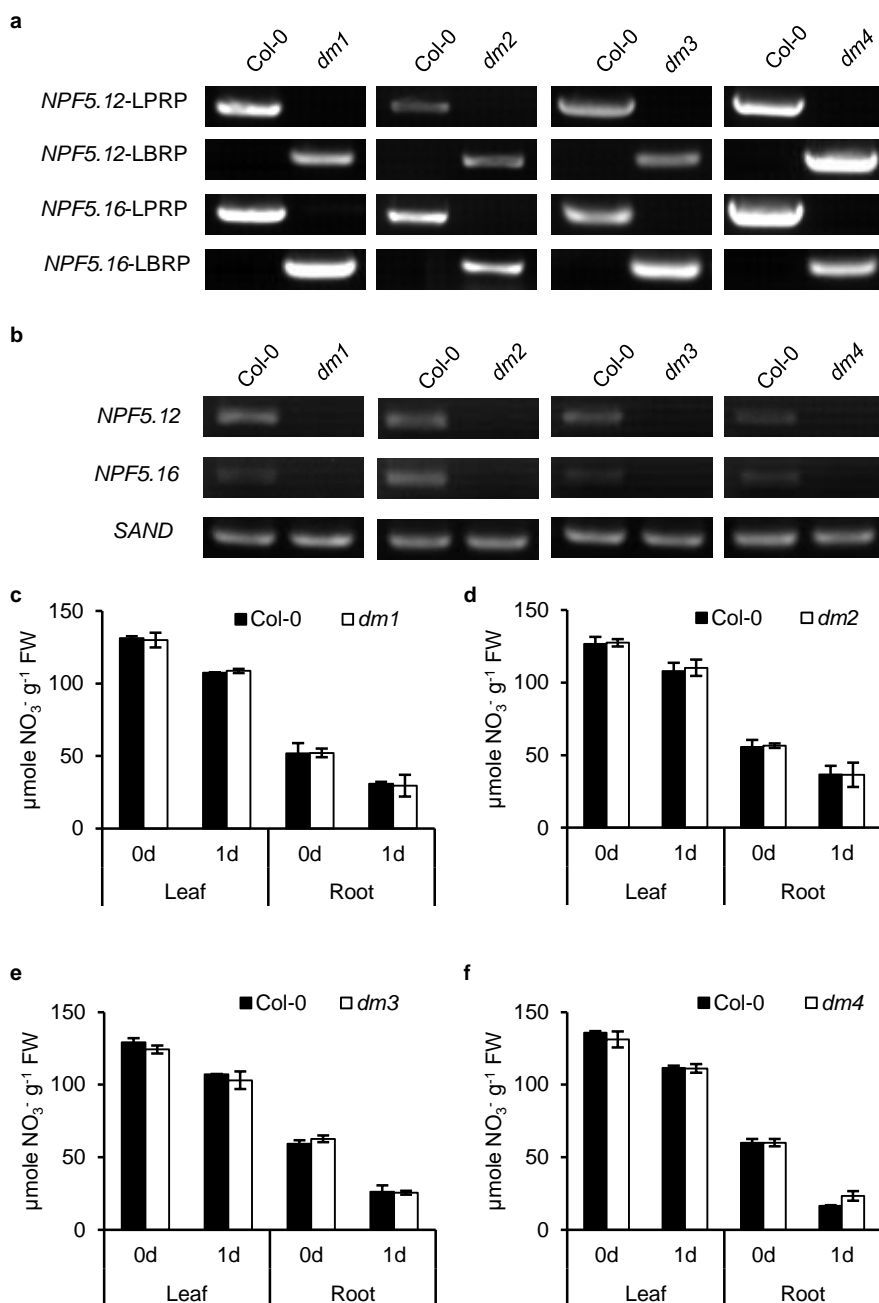

**Supplementary Figure S6. Nitrate contents is not affected in *npf5.12 npf5.16* double mutant lines.**

(a,b) Analysis of T-DNA insertion (a) and *NPF5.12*, *NPF5.16* expression in seedlings of *npf5.12 npf5.16* double mutant lines (b). *dm1*, *npf5.12-1 npf5.16-1*; *dm2*, *npf5.12-1 npf5.16-2*; *dm3*, *npf5.12-2 npf5.16-1*; *dm4*, *npf5.12-2 npf5.16-2*. *SAND* (loading control) was amplified for 28 cycles, *NPF5.12* and *NPF5.16* was amplified for 32 cycles in (b). (c-f) Nitrate concentration in *dm1* (c), *dm2* (d), *dm3* (e), *dm4* (f). 23-day-old plants were subjected to nitrogen-starved nutrient solution for indicated time. The leaves and roots of wild type and double mutant lines were harvested to analyze nitrate concentration. Values are means  $\pm$  SD, n = 3.

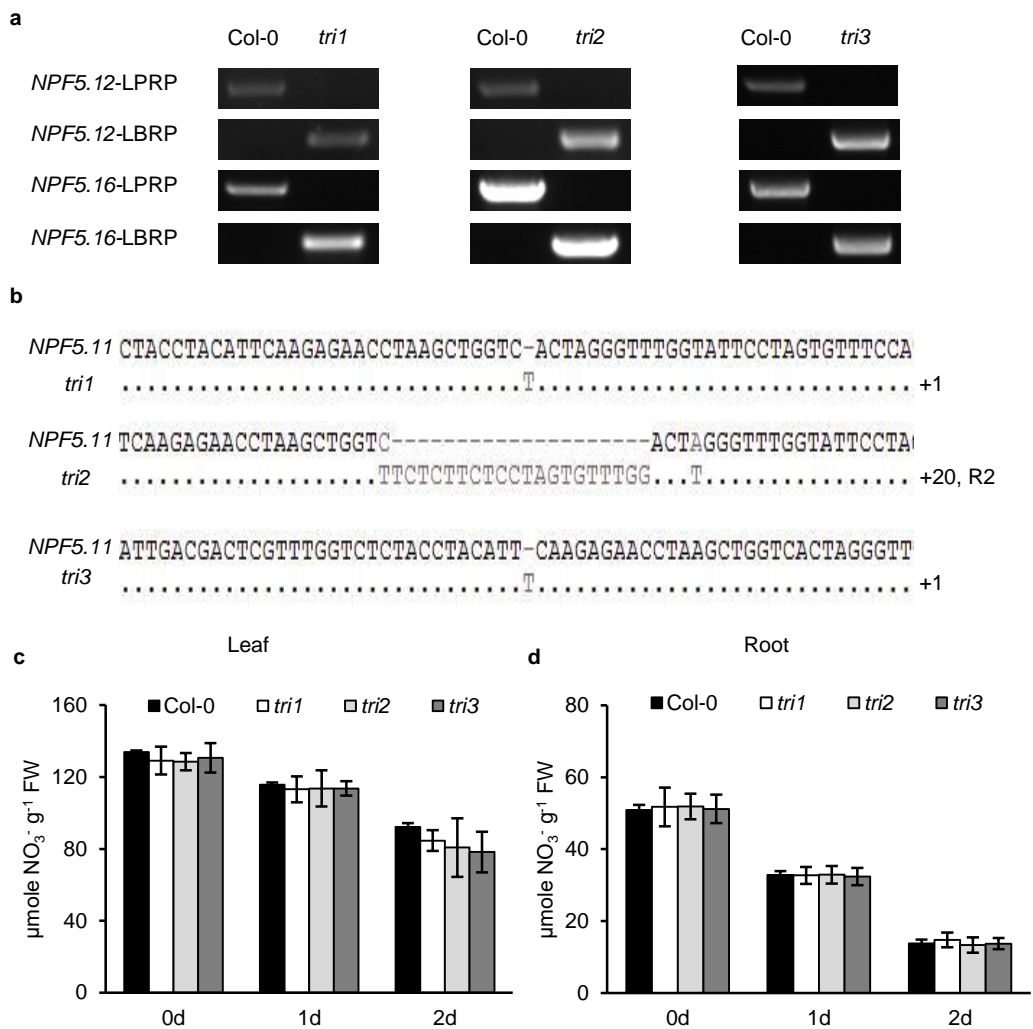

**Supplementary Figure S7. Nitrate contents is not affected in *npf5.11 npf5.12 npf5.16* triple mutant lines.**

(a) PCR identification of T-DNA insertion in *npf5.11 npf5.12 npf5.16* triple mutant lines. (b) Sequence of edited *NPF5.11* in triple mutant lines. The nucleotide changes were on the right of each sequence (+, insertion; R, replace). (c,d) Nitrate concentration in leaves (c) or roots (d) of triple mutant lines. 28-day-old plants were subjected to nitrogen-starved nutrient solution for indicated time. Values are means  $\pm$  SD, n = 3.



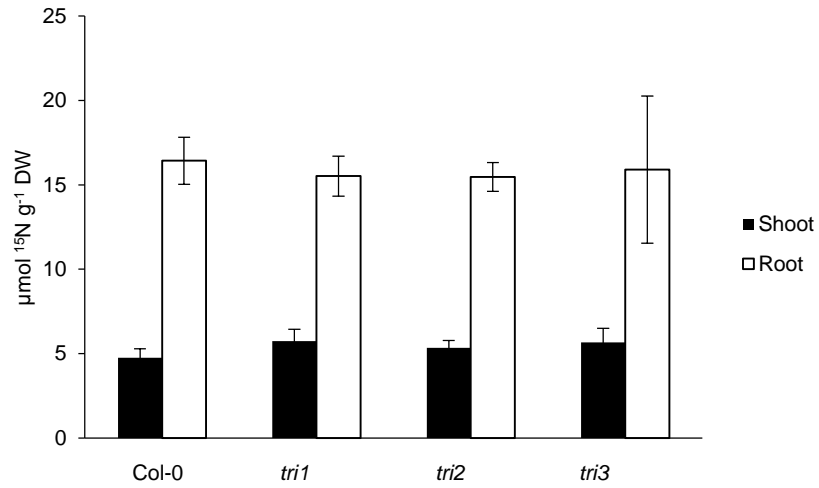

**Supplementary Figure S8.  $^{15}\text{NO}_3^-$  concentration in shoots and roots of triple mutant plants.**

Plants were grown in hydroponics for 28 days and treated with 2.25 mM  $\text{K}^{15}\text{NO}_3$  for 30 min.  $^{15}\text{N}$  concentration in shoots and roots were analyzed. Values are means  $\pm$  SD,  $n = 3$ .

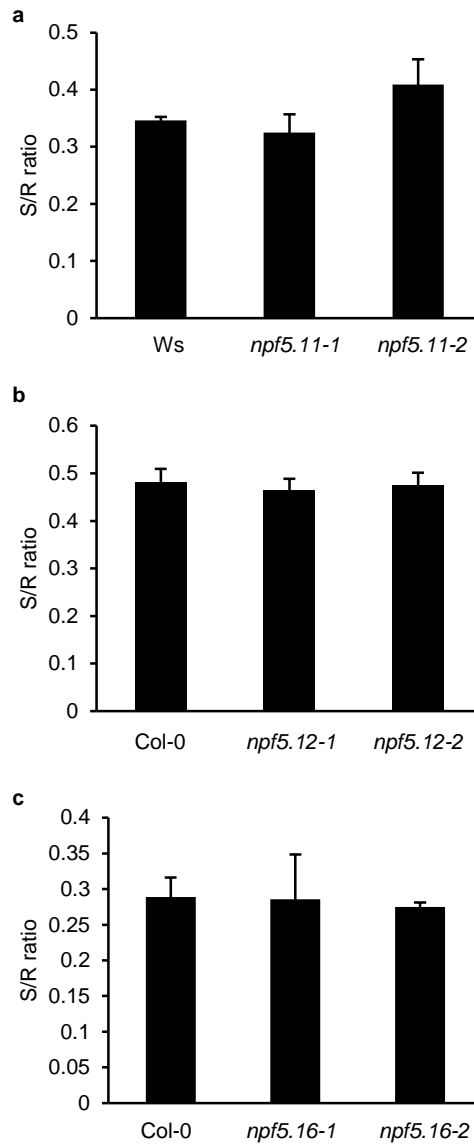

**Supplementary Figure S9. Root-to-shoot nitrate transport was not affected in *npf5.11*, *npf5.12*, *npf5.16* single mutants.**

28-day-old plants were treated with 2.25 mM  $K^{15}NO_3$  for 30 min,  $^{15}N$  contents in shoots and roots were detected and the  $^{15}N$  concentration ratio in shoot and root (S/R ratio) of *npf5.11* (a), *npf5.12* (b), *npf5.16* (c) were calculated. Values are means  $\pm$  SD, n = 3.

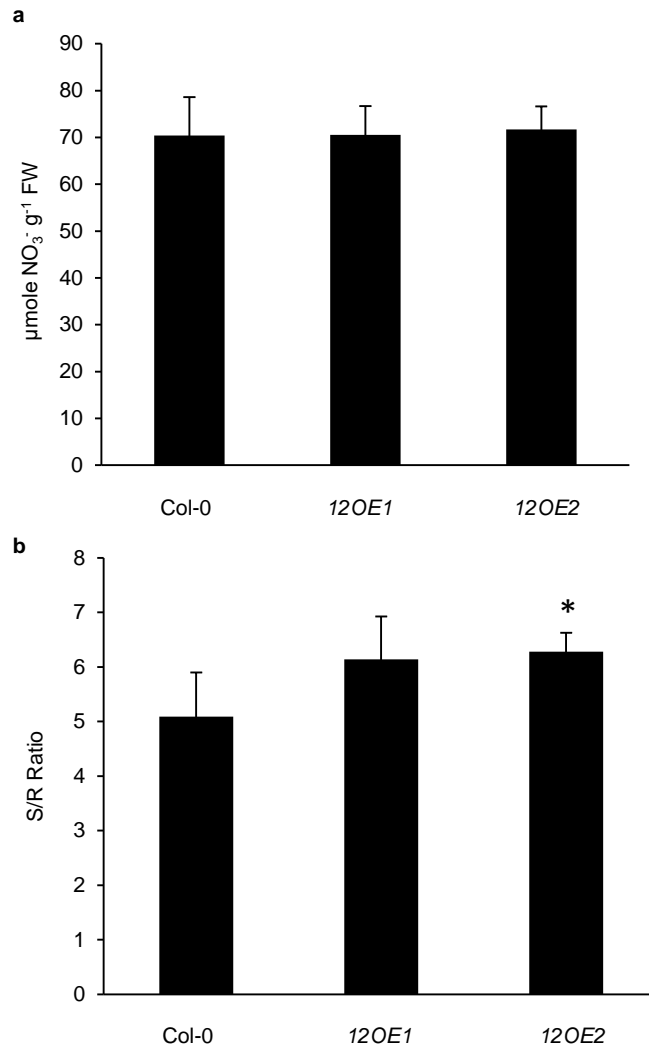

**Supplementary Figure S10. Nitrate accumulation in shoots and the S/R ratio of *NPF5.12* overexpression lines.**

24 days old plants grown hydroponically were subjected to nitrogen-starvation for 30 h, then nitrate contents in shoots were determined by HPLC (**a**) and the S/R ratios were calculated (**b**). *12OE1* and *12OE2* were two independent *NPF5.12* overexpression lines. Values are means  $\pm$  SD, n = 5-7. Asterisks indicate difference between wild type and overexpression lines at  $P < 0.05$  (\*) by Student's t-test.

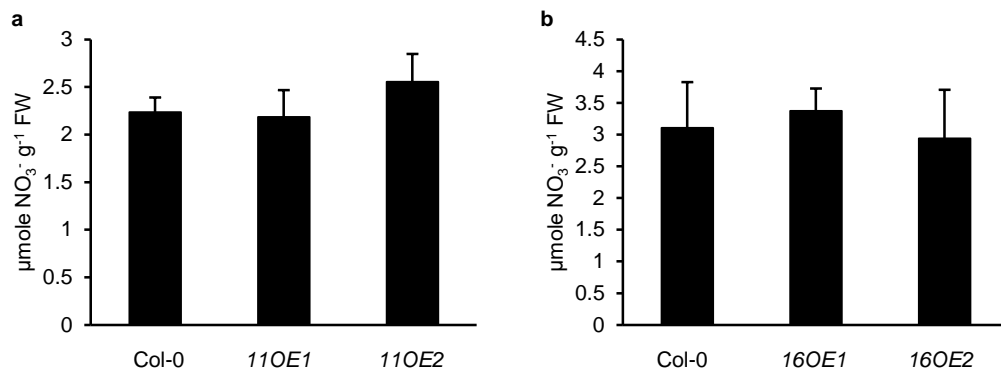

**Supplementary Figure S11. Overexpression of *NPF5.11* or *NPF5.16* do not affect nitrate contents in roots under nitrogen-starved condition.**

28 days old hydroponically grown plants were subjected to nitrogen-starvation for 2 d, then roots of 11OE1 and 11OE2 (a), 16OE1 and 16OE2 (b) were sampled and nitrate contents were measured by HPLC. 11OE1 and 11OE2 were two independent *NPF5.11* overexpression lines. 16OE1 and 16OE2 were two independent *NPF5.16* overexpression lines. Values are means  $\pm$  SD, n = 3.

**Supplemental Table S1. List of primer sequences**

| Destination                                            | Forward primer                     | Reverse primer                 |
|--------------------------------------------------------|------------------------------------|--------------------------------|
| <b>Genotyping</b>                                      |                                    |                                |
| <i>npf5.11-1</i>                                       | CTGAGGGTTTTCTGGAAATCC              | CTGCCCTGTCTAGGAATCTGC          |
| <i>npf5.11-2</i>                                       | GTATGAATGTACGGCCAGTGC              | TCCCTGTTTGTTTTGTTTTCG          |
| <i>npf5.12-1</i>                                       | CAAACGTTAACCTCTGGCTTG              | TTTTGTTTGTAACAACAAAACACAGTG    |
| <i>npf5.12-2</i>                                       | CAAACGTTAACCTCTGGCTTG              | TTTTCATCTCGACCAAAGCAG          |
| <i>npf5.16-1</i>                                       | TCGTGTTTCATTATTCACGCAG             | GAAAACTCTACCGATCCTCGC          |
| <i>npf5.16-2</i>                                       | CGCCTTGTTTTGTGAAGAAAG              | TCGTGTTTCATTATTCACGCAG         |
| LB4                                                    | CGTGTGCCAGGTGCCACGGAATAGT          |                                |
| GABI-LB                                                | ATATTGACCATCATACTCATTGC            |                                |
| LB3                                                    | TAGCATCTGAATTTCATAACCAATCTCGATACAC |                                |
| LBb1.3                                                 | ATTTTGCCGATTTTCGGAAC               |                                |
| <b>CRISPR-Cas9 system</b>                              |                                    |                                |
| Target sequence-1                                      | GAGAACCTAAGCTGGTCACT               |                                |
| Target sequence-2                                      | GCTTAGGTTCTCTTGAATGT               |                                |
| <i>Cas9</i>                                            | AGCAGCCGACAAGAAGTACAGC             | GCTTTCAGCAGGGTCAGGTCCT         |
| <b>Transient expression &amp; Plant transformation</b> |                                    |                                |
| <i>NPF5.11</i>                                         | ctcgagATGGCTATCACCTACTCCTC         | actagtAAAGGTGTTTGATCTGCTGT     |
| <i>NPF5.12</i>                                         | ggatccATGTCGACATCCATCGGCGATA       | actagtCTTTGGGCTGTTGTAGAGAT     |
| <i>NPF5.16</i>                                         | gtcgacATGGCGATAGCCGAAGA            | ggatccGACTTGATCTACACGGC        |
| <i>NPF5.11pro</i>                                      | gtcgacTACAGCTCTTGTGTCAGGCTTA       | ggatccTAATGTGTATGATTGATTGG     |
| <i>NPF5.12pro</i>                                      | gtcgacCTAACGCGACAGCAAGCACT         | ggatccTGCTTCTTGTTATTTGTTT      |
| <i>NPF5.16pro</i>                                      | gtcgacCATTGCGCGGTGGGCAAT           | cccgggTTTCTTGTGCGAGGAAAC       |
| <b>RT-PCR &amp; qRT-PCR</b>                            |                                    |                                |
| <i>npf5.11-1</i>                                       | CGAATCAGCTGCAAGAGACTATCT           | AAGAGTCCTGGTGAGATTGACCTG       |
| <i>npf5.11-2</i>                                       | ATGGCTATCACCTACTCCTCCGC            | GATGATGAGCCTCGCTGATTTCC        |
| <i>npf5.12-1/npf5.12-2</i>                             | AATCTGATAACCTACTTCACCGAGGC         | CGGTAAGTTTTGATTCCAAGTAAGAACAAG |
| <i>npf5.16-1/npf5.16-2</i>                             | GATAGCCGAAGAAGAAGCTGCA             | CCAAAAGCTTGAACACATGGCT         |
| <i>Actin2</i>                                          | CCCTGTTCTTCTTACCGAG                | CCACATCTGCTGGAATG              |
| <i>SAND</i>                                            | GATGAGGATGATGCTTCTACG              | CCTGAGCGTTGTATCTTGGT           |
| <i>qNPF5.11</i>                                        | GCGTTGGTATGGCTTTGAAC               | GCCAGTAGCCAGTAGAAGTAATC        |
| <i>qNPF5.12</i>                                        | CATGGTATCAGTCATCGAGGAAG            | GACAAGCAAGTAGCCAGTAGAA         |
| <i>qNPF5.16</i>                                        | CCACGGAGCTAAGGAGTATTG              | GGGCTCTGTTGAGTTAGTATT          |
| <i>qSAND</i>                                           | ATATGACACCCTTGCTTGGAGGGA           | TGAGAATAAGACACCAGACGCGCA       |
